# Supplementary material for: FAS-associated factor-1 positively regulates type I interferon response to RNA virus infection by targeting NLRX1
Source: PLOS journal article supplement (doi:10.1371/journal.ppat.1006398), 2017-05-22
Supplement: S6 (10.1371/journal.ppat.1006398.s006) [file journal.ppat.1006398.s006]

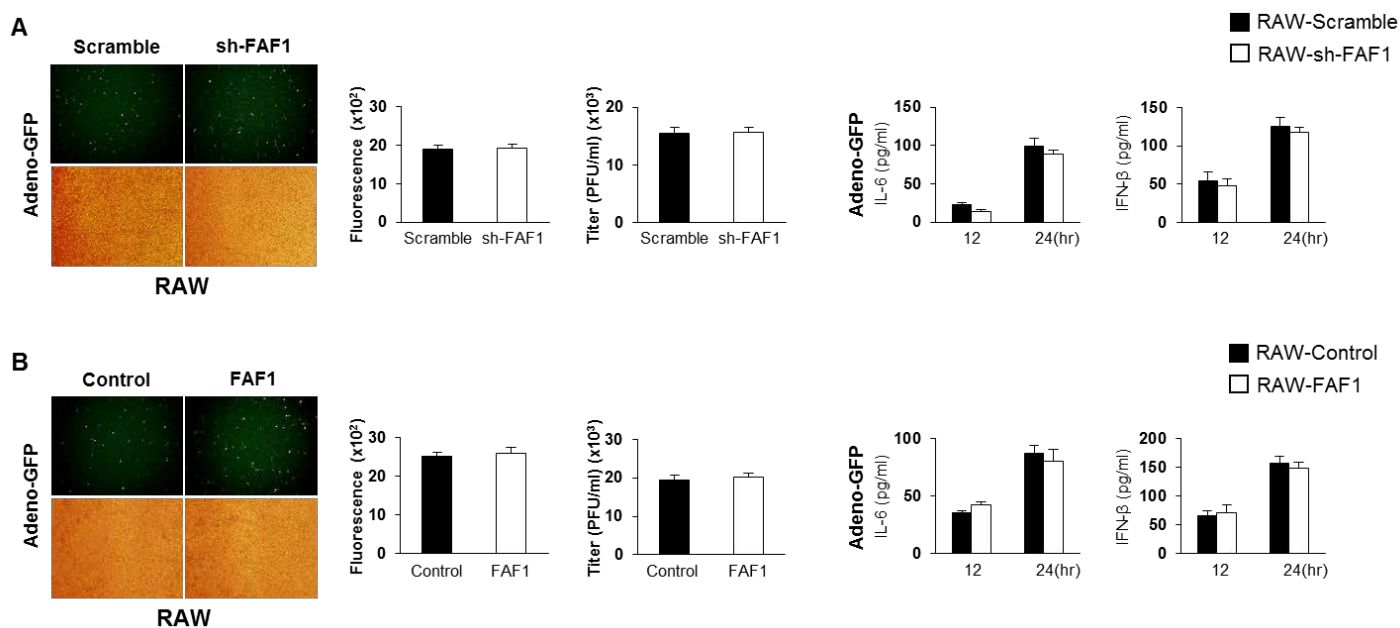

**S6 Fig. FAF1 has no role in antiviral activity upon DNA virus infection in RAW264.7 cells.**

(A) RAW264.7 cells were infected with lentivirus harboring scramble and FAF1 shRNA to prepare control RAW264.7 (RAW-Scramble) and FAF1 knockdown RAW264.7 (RAW-sh-FAF1), respectively. Cells were infected with Adenovirus (MOI=4). After 24 hr, the virus titer was measured by plaque assay, and IL-6 and IFN- $\beta$  levels in the supernatant were measured by ELISA at 12 and 24 hpi. Data are presented as the mean  $\pm$  SEM. Data are representative of at least two independent experiments. (B) Stably expressing control (RAW-Control) and FAF1-overexpressing (RAW-FAF1) cells were infected with VSV-GFP (MOI=1). At 24 hpi, GFP expression was visualized under a fluorescence microscopy (200  $\times$  magnification) and quantified using a fluorescence modulator. Virus titers were measured by plaque assay. Culture supernatants were collected at 12 h and 24 hpi, and IL-6 and IFN- $\beta$  levels were measured by ELISA. Data are presented as the mean  $\pm$  SEM. Data are representative of at least two independent experiments.
