# Supplementary material for: FAS-associated factor-1 positively regulates type I interferon response to RNA virus infection by targeting NLRX1
Source: PLOS journal article supplement (doi:10.1371/journal.ppat.1006398), 2017-05-22
Supplement: S9 (10.1371/journal.ppat.1006398.s009) [file journal.ppat.1006398.s009]

**A**

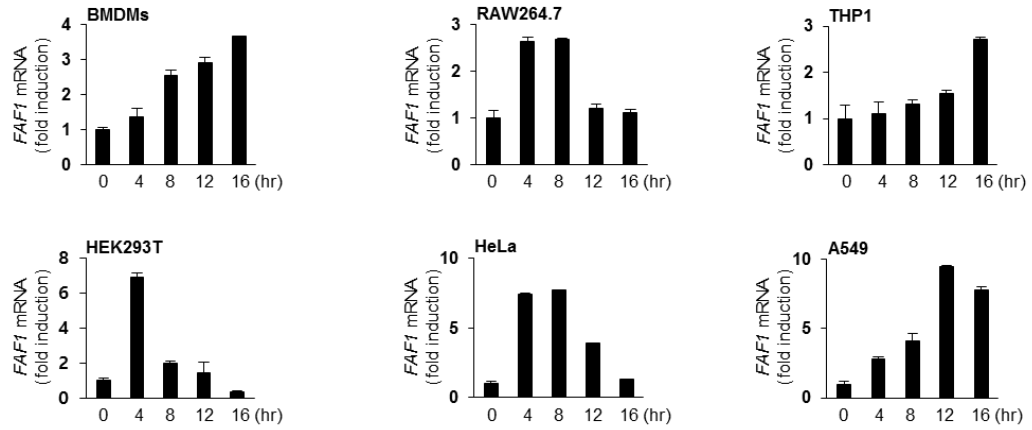

**S9 Fig. FAF1 mRNA expression was increased in various cell types after PR8-GFP infection.** (A) Different cell types were infected with PR8-GFP (BMDMs, MOI=3; RAW264.7, MOI=2; MEFs, MOI=1; THP-1, MOI=3; HEK293T, MOI=1; HeLa, MOI=2; and A549, MOI=2). Total RNA was extracted from infected cells at indicated time points and FAF1 mRNA expression was analyzed by qRT-PCR. Data represent mean  $\pm$  SD.
